# Supplementary material for: Highly conductive and transient tracks based on silver flakes and a polyvinyl pyrrolidone composite
Source: Royal Society of Chemistry journal article supplement (doi:10.1039/d0ra06603f), 2020-01-01
Supplement: d0ra06603f1.pdf [file d0ra06603f1.pdf]

## Highly conductive and transient tracks based on silver flakes and polyvinyl pyrrolidone composite

Su Ding<sup>a,\*</sup>, Qingfeng Cai<sup>a</sup>, Jintao Mao<sup>a</sup>, Fei Chen<sup>a</sup>, Li Fu<sup>a</sup>, Yanfei Lv<sup>a</sup>, Shichao Zhao<sup>a,\*</sup>,

<sup>a</sup>College of Materials and Environmental Engineering, Hangzhou Dianzi University, 310018

Hangzhou, P.R. China

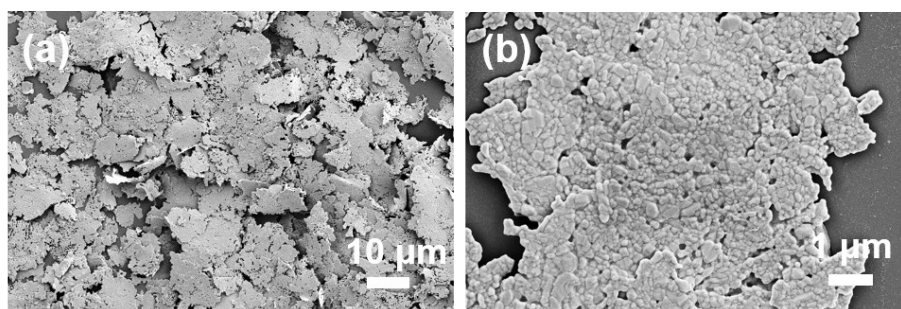

Figure S1 SEM images of AgFs (a) low magnification, (b) high magnification

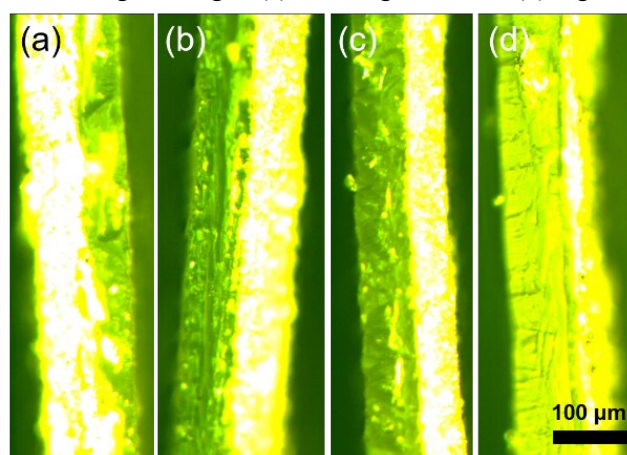

Figure S2 Optical images of AgF/PVP conductive tracks with different AgF contents. (a) 40%, (b) 45%, (c) 50%, (d) 60%

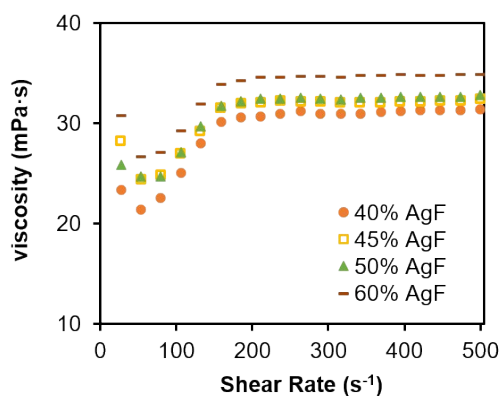

Figure S3 Viscosity curves of Ag pastes with various AgF concentrations.

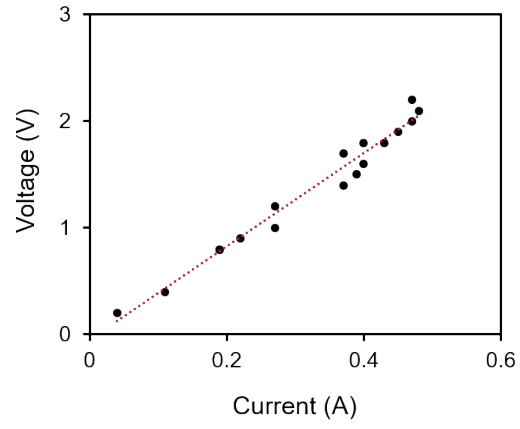

Figure S4 Plot of current versus voltage for AgF/PVP conductive track with 40% AgF containment.
